# Supplementary material for: Mantonico and Pecorello Grape Seed Extracts: Chemical Characterization and Evaluation of In Vitro Wound-Healing and Anti-Inflammatory Activities
Source: PubMed Central journal article supplement (PMC7281466; doi:10.3390/ph13050097), 2020-05-14
Supplement: pharmaceuticals-13-00097-s001.pdf [file pharmaceuticals-13-00097-s001.pdf]

## SUPPORTING INFORMATION

# Mantonico and Pecorello grape seed extracts: chemical characterization and evaluation of *in vitro* wound-healing and anti-inflammatory activities

Gabriele Carullo<sup>1</sup>, Fabio Sciubba<sup>2</sup>, Paolo Governa<sup>3</sup>, Sarah Mazzotta<sup>1,4</sup>, Luca Frattaruolo<sup>1</sup>, Giorgio Grillo<sup>5</sup>, Anna Rita Cappello<sup>1</sup>, Giancarlo Cravotto<sup>5</sup>, Maria Enrica Di Cocco<sup>2</sup> and Francesca Aiello<sup>1,\*</sup>

<sup>1</sup> Department of Pharmacy, Health and Nutritional Sciences, University of Calabria, Edificio Polifunzionale, 87036, Rende (CS), Italy.

<sup>2</sup> Department of Chemistry, University "La Sapienza" Rome, Piazzale Aldo Moro 5, 00185, Rome, Italy.

<sup>3</sup> Department of Biotechnologies, Chemistry and Pharmacy, University of Siena, Via Aldo Moro 2, 53100, Siena, Italy.

<sup>4</sup> Department of Organic and Medicinal Chemistry, Faculty of Pharmacy, University of Seville, C/O Prof. Garcia Gonzalez, 41071, Seville, Spain.

<sup>5</sup> Department of Drug Science and Technology, University of Turin, Via P. Giuria 9, 10125, Turin, Italy.

\* Correspondence: [francesca.aiello@unical.it](mailto:francesca.aiello@unical.it); Tel.: +39 0984 493154

## INDEX

Figure S1. Monodimensional <sup>1</sup>H spectrum of CM

Figure S2. Bidimensional <sup>1</sup>H-<sup>1</sup>H TOCSY spectrum of CM

Figure S3. Bidimensional <sup>1</sup>H-<sup>13</sup>C HSQC spectrum of CM

Figure S4. Monodimensional <sup>1</sup>H spectrum of CP

Figure S5. Monodimensional <sup>1</sup>H spectrum of HM

Figure S6. Monodimensional <sup>1</sup>H spectrum of HP

Figure S7. Bidimensional <sup>1</sup>H-<sup>1</sup>H TOCSY spectrum of HP

Figure S8. Bidimensional <sup>1</sup>H-<sup>13</sup>C HSQC spectrum of HP

Table S1. Table of resonance assignments

Figure S9. GC-MS qualitative analysis for CM extract

Table S2. Identification of CM peaks

Figure S10. GC-MS qualitative analysis for CP extract

Table S3. Identification of CP peaks

Figure S11. GC-MS qualitative analysis for HM extract

Table S4. Identification of HM peaks

Figure S12. GC-MS qualitative analyses for HP extract

Table S5. Identification of HP peaks

Figure S13. HaCaT cell viability assay

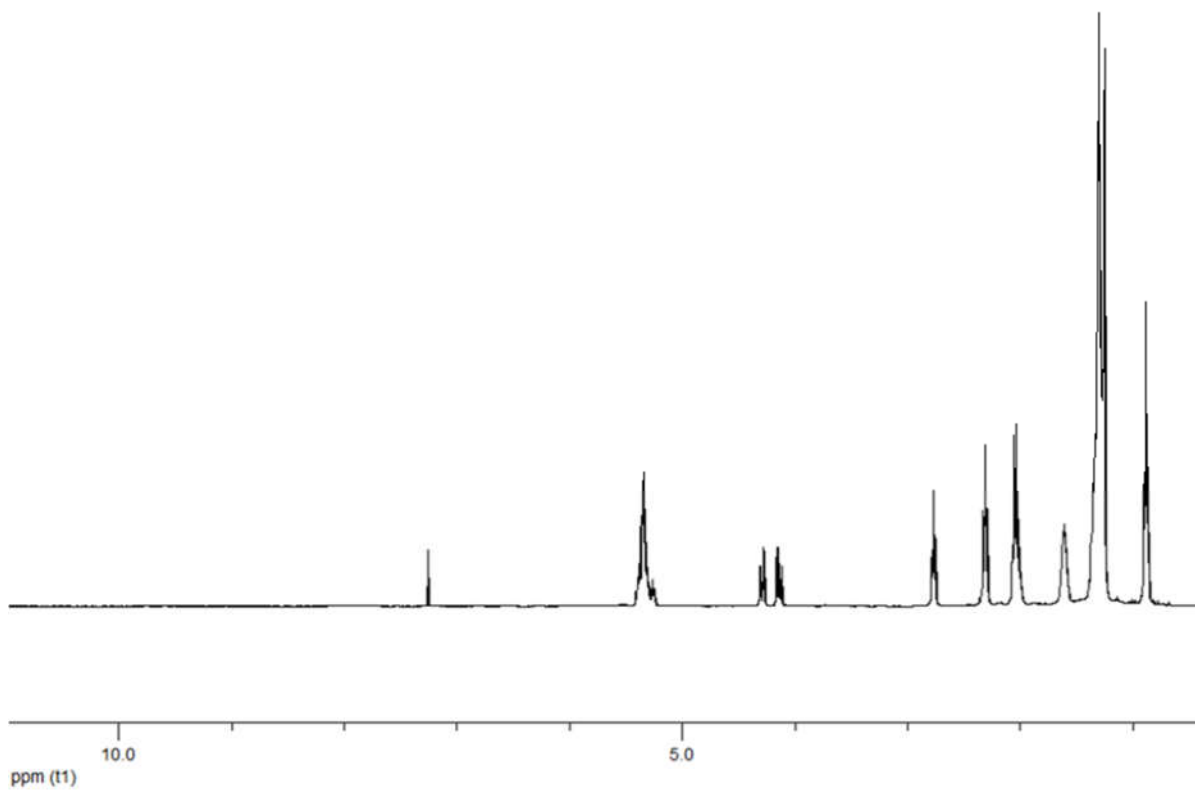

Figure S1. Monodimensional  $^1\text{H}$  spectrum of CM

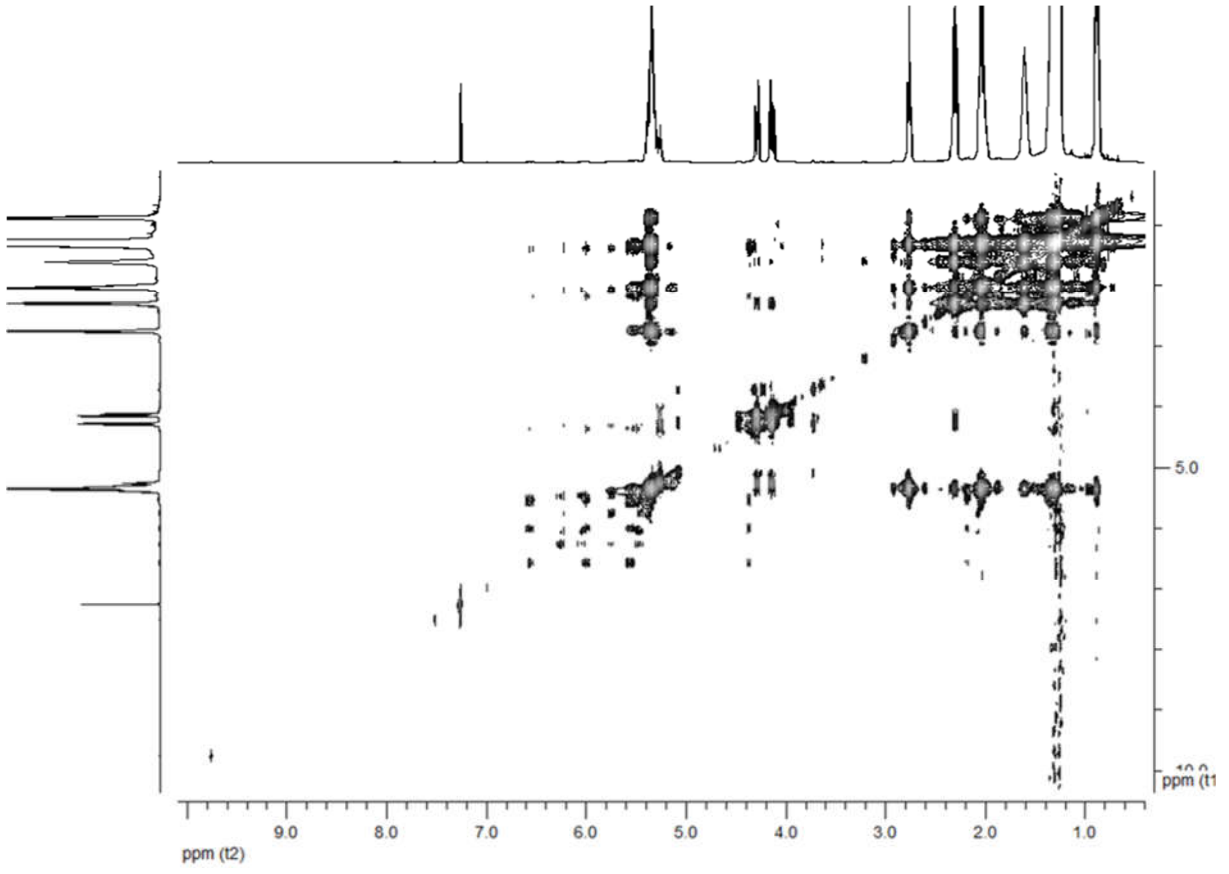

Figure S2. Bidimensional  $^1\text{H}$ - $^1\text{H}$  TOCSY spectrum of CM

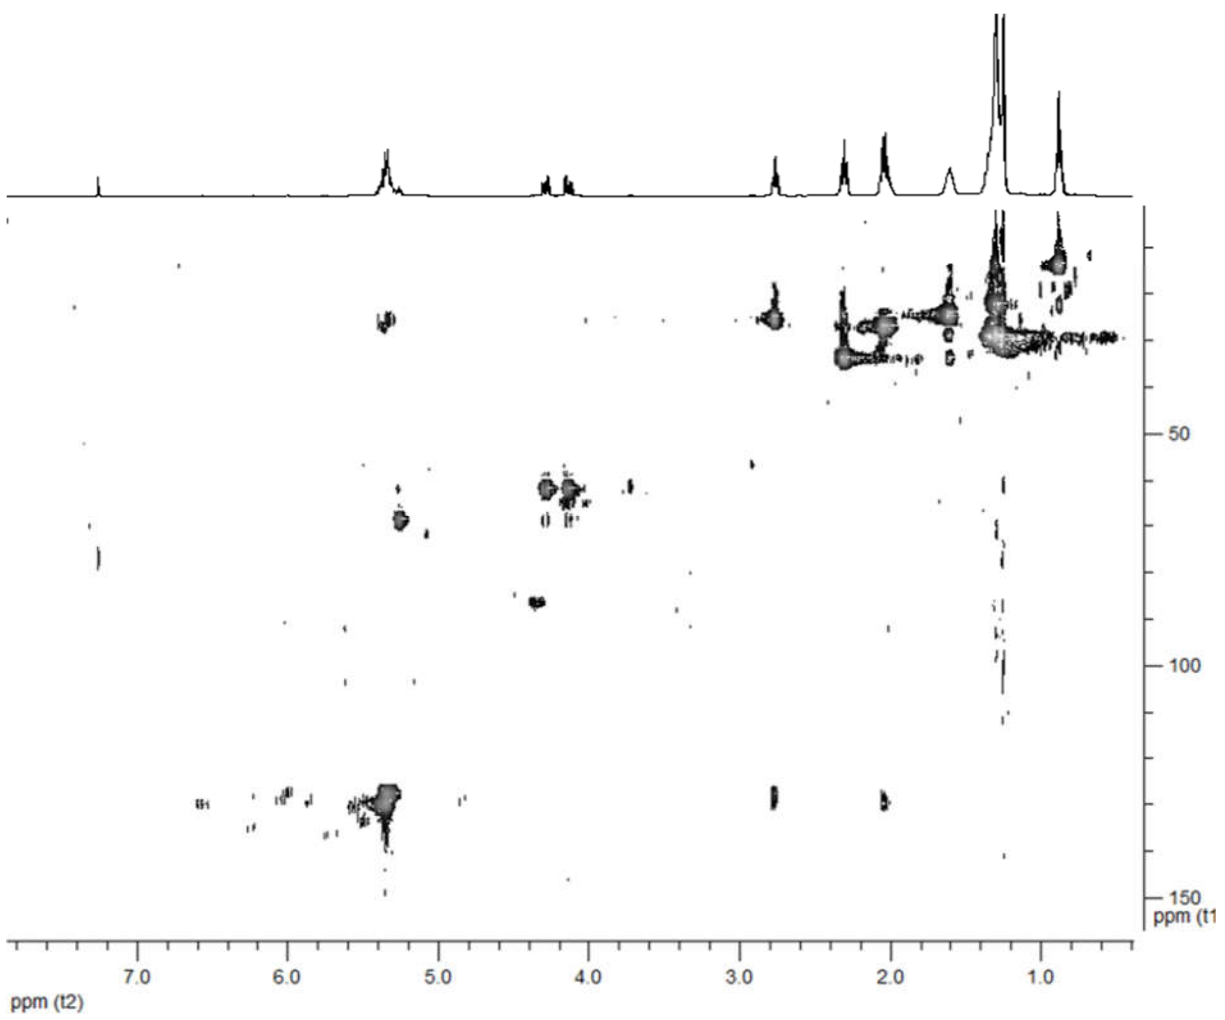

Figure S3. Bidimensional  $^1\text{H}$ - $^{13}\text{C}$  HSQC spectrum of CM

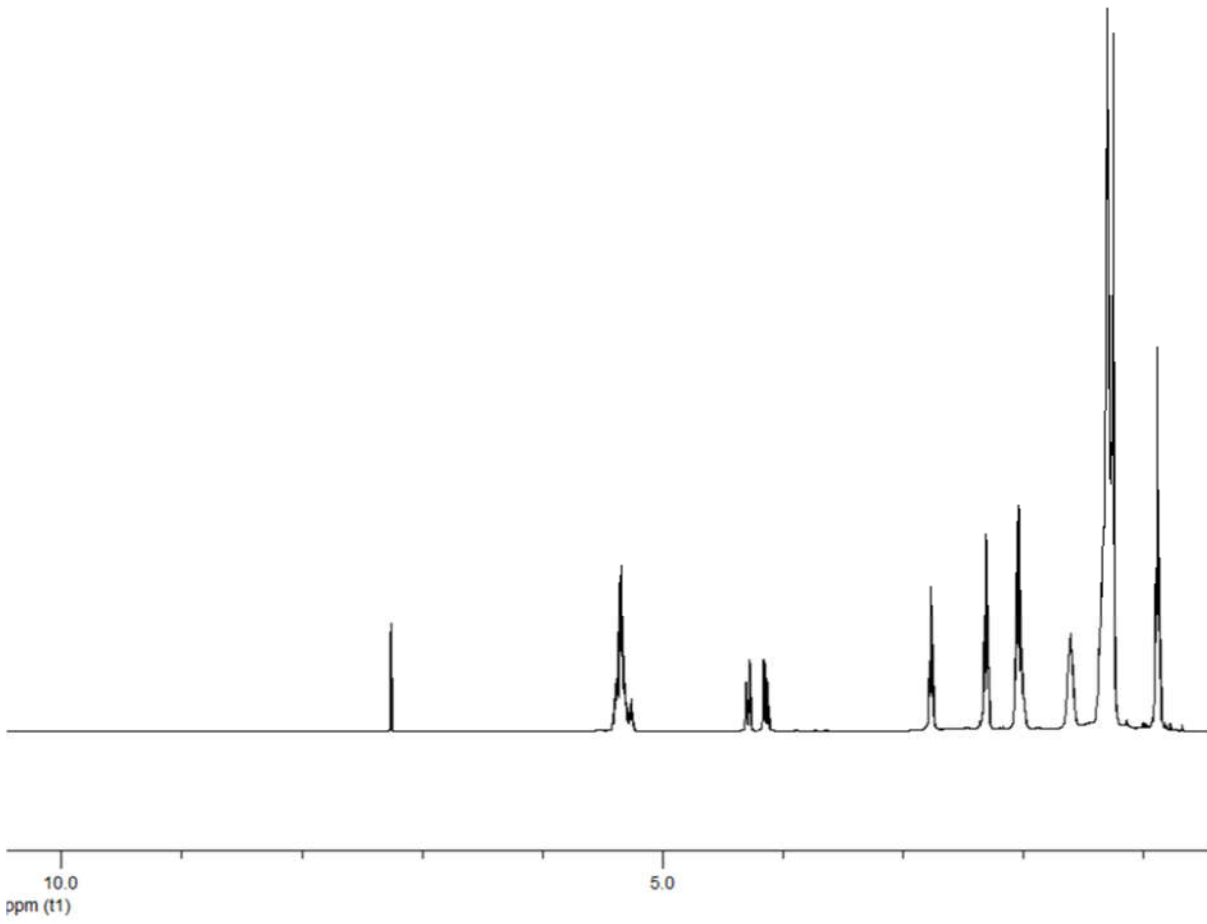

Figure S4. Monodimensional <sup>1</sup>H spectrum of CP

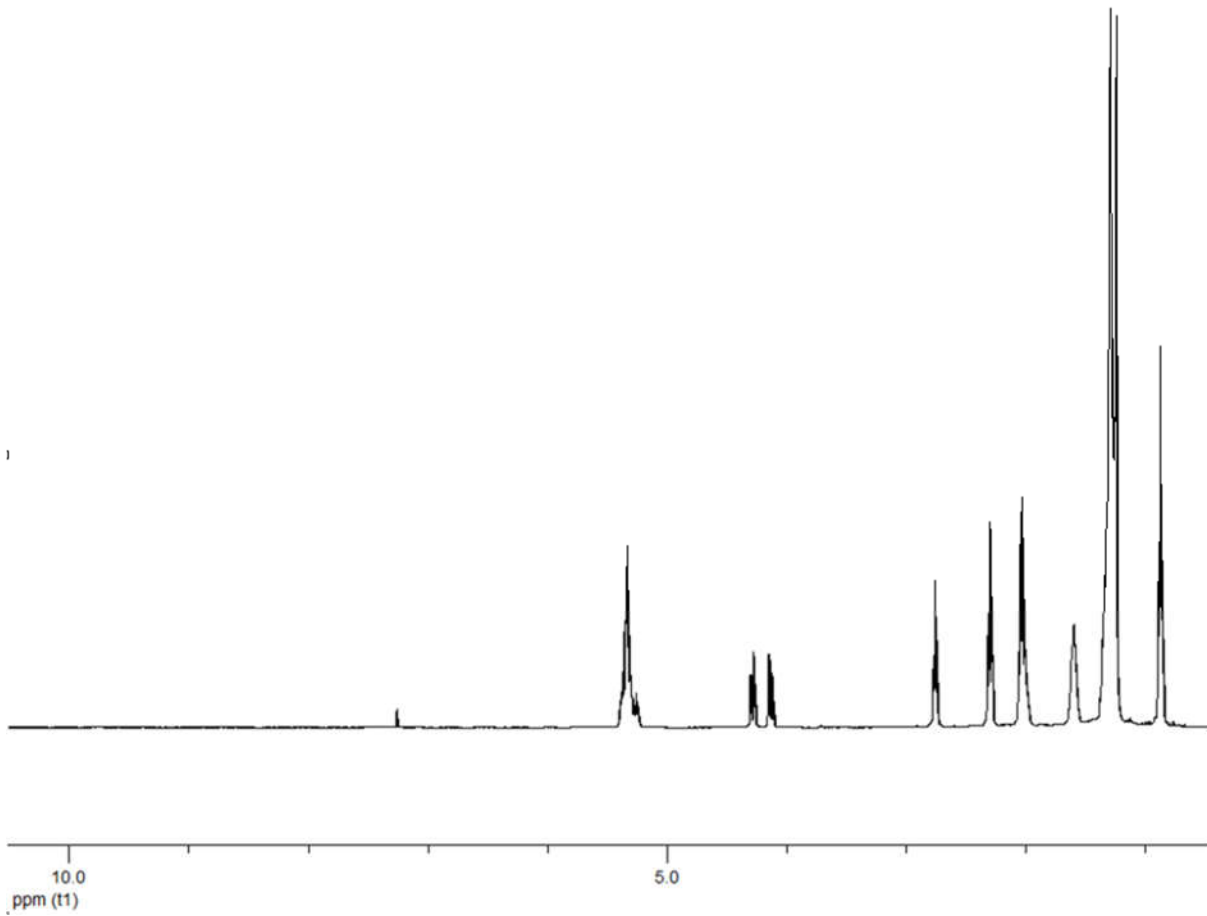

Figure S5. Monodimensional  $^1\text{H}$  spectrum of HM

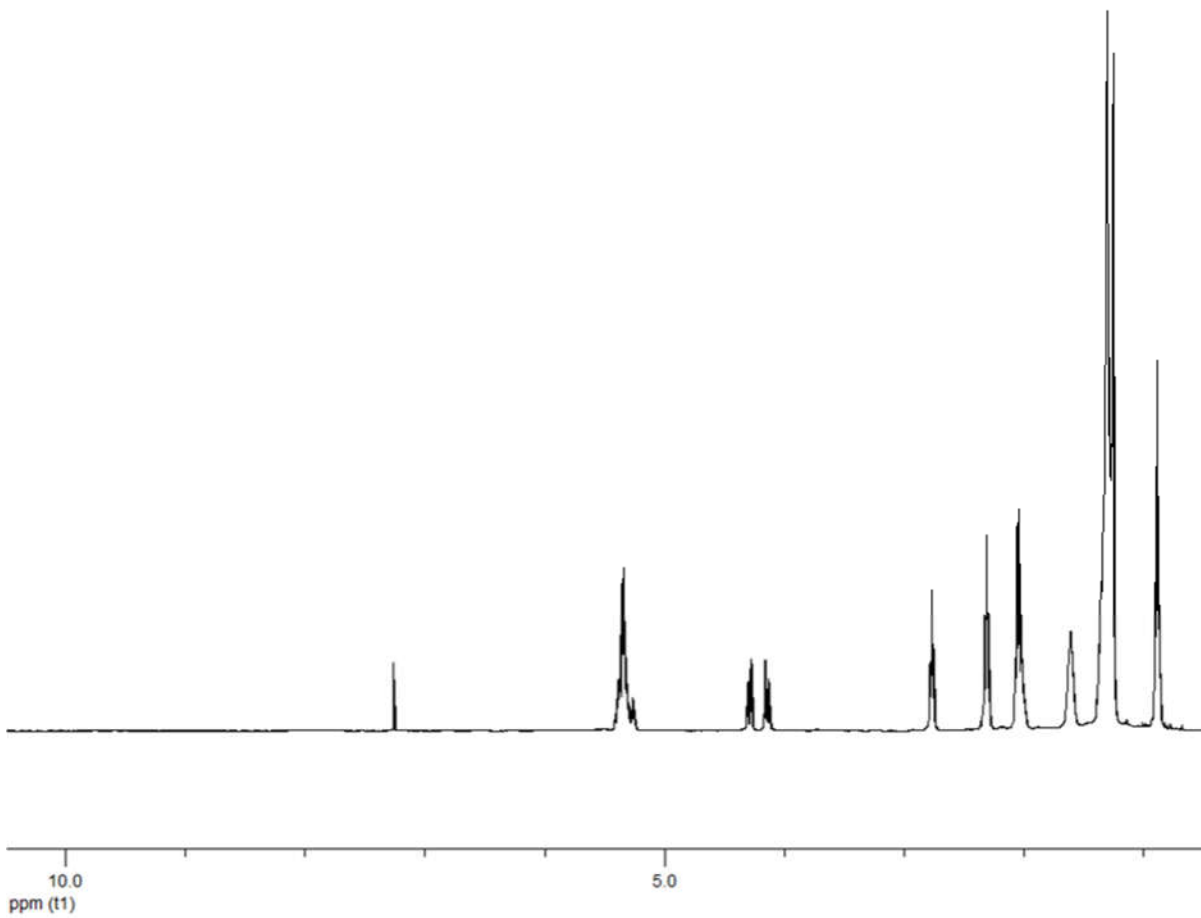

Figure S6. Monodimensional <sup>1</sup>H spectrum of HP

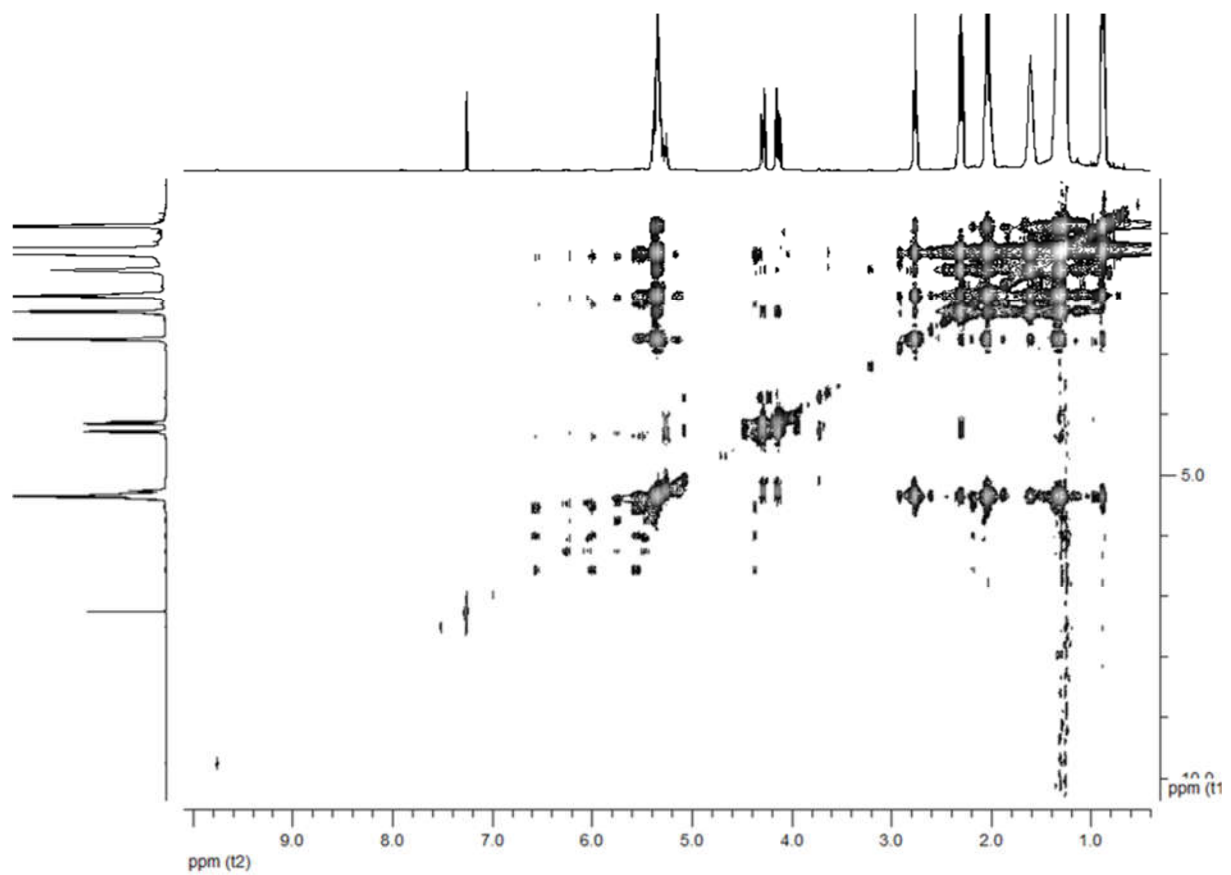

Figure S7. Bidimensional  $^1\text{H}$ - $^1\text{H}$  TOCSY spectrum of HP



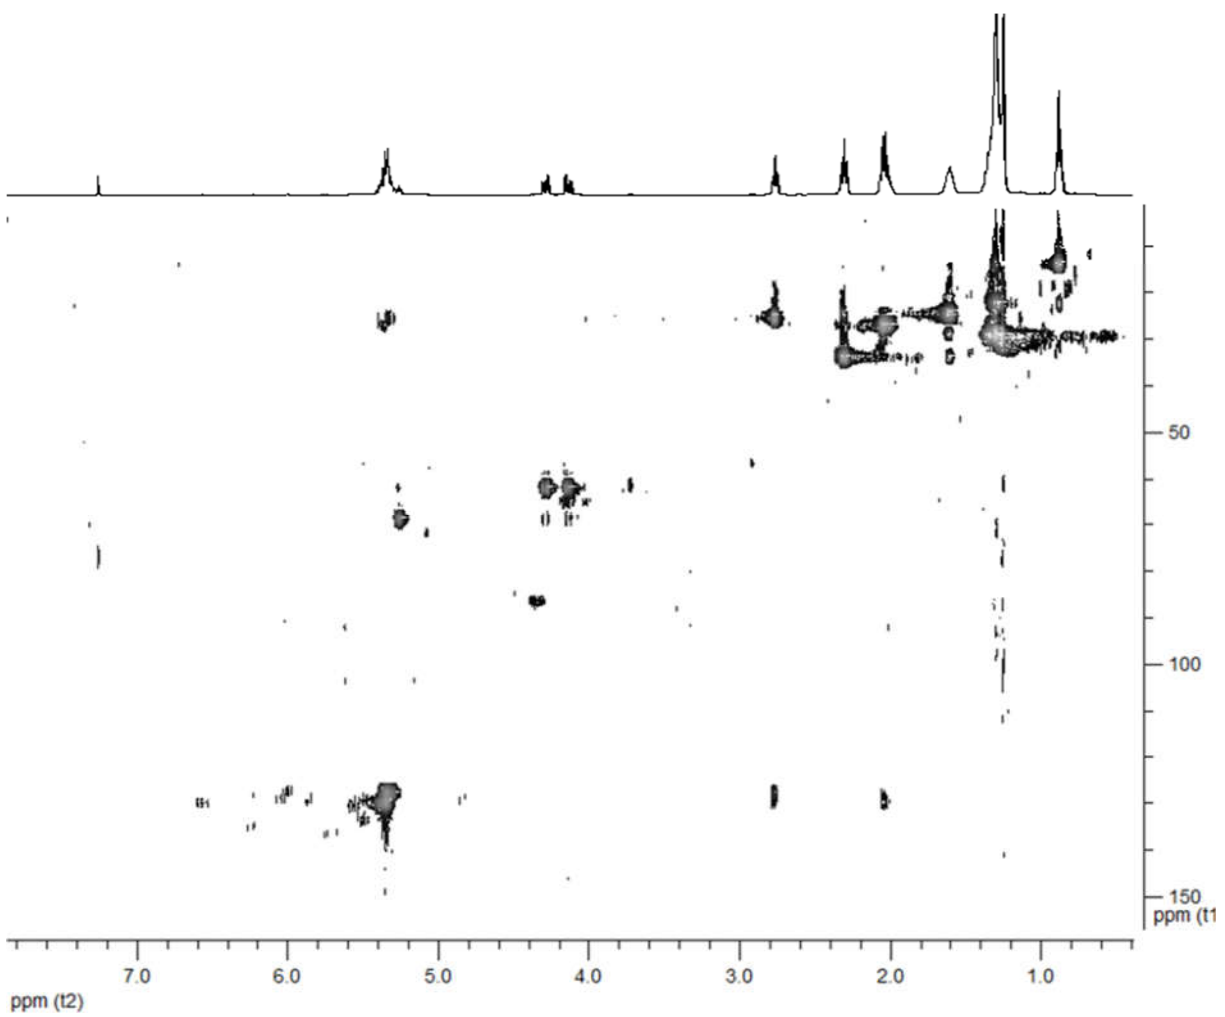

Figure S8. Bidimensional  $^1\text{H}$ - $^{13}\text{C}$  HSQC spectrum of HP

Table S1. Table of resonance assignments

| Compound <sup>1</sup> | Assignment <sup>2</sup>                                               | <sup>1</sup> H δ (ppm) | Multiplicity <sup>3</sup> | <sup>13</sup> C δ (ppm) |
|-----------------------|-----------------------------------------------------------------------|------------------------|---------------------------|-------------------------|
| Stearic acid          | CH <sub>3</sub>                                                       | 0.87                   | t                         | 14.05                   |
|                       | n-CH <sub>2</sub>                                                     | 1.26                   | m                         | 29.32                   |
|                       | <u>CH</u> <sub>2</sub> -CH <sub>2</sub> -CO <sub>2</sub> <sup>-</sup> | 1.62                   | m                         | 24.61                   |
|                       | CH <sub>2</sub> -CO <sub>2</sub> <sup>-</sup>                         | <b>2.30</b>            | <b>t</b>                  | 33.52                   |
| Oleic acid            | CH <sub>3</sub>                                                       | 0.88                   | t                         | 14.07                   |
|                       | n-CH <sub>2</sub>                                                     | 1.27                   | m                         | 29.35                   |
|                       | CH <sub>2</sub> -CH=CH                                                | <b>2.03</b>            | <b>m</b>                  | 27.14                   |
|                       | CH=CH                                                                 | 5.35                   | m                         | 129.84; 127.43          |
|                       | <u>CH</u> <sub>2</sub> -CH <sub>2</sub> -CO <sub>2</sub> <sup>-</sup> | 1.62                   | m                         | 24.61                   |
|                       | CH <sub>2</sub> -CO <sub>2</sub> <sup>-</sup>                         | 2.31                   | t                         | 33.96                   |
| Linoleic acid         | CH <sub>3</sub>                                                       | 0.86                   | t                         | 14.06                   |
|                       | n-CH <sub>2</sub>                                                     | 1.36                   | m                         | 29.37                   |
|                       | <u>CH</u> <sub>2</sub> -CH=CH                                         | 2.04                   | m                         | 29.45                   |
|                       | CH=CH                                                                 | 5.37                   | m                         | 130.29; 128.45          |
|                       | =CH- <u>CH</u> <sub>2</sub> -CH=                                      | <b>2.76</b>            | <b>t</b>                  | 25.68                   |
|                       | <u>CH</u> <sub>2</sub> -CH <sub>2</sub> -CO <sub>2</sub> <sup>-</sup> | 2.06                   | m                         | 24.75                   |
|                       | CH <sub>2</sub> -CO <sub>2</sub> <sup>-</sup>                         | 2.31                   | t                         | 34.05                   |
| Monoacylglycerol      | CH <sub>2</sub>                                                       | <b>3.65-3.55</b>       | <b>dd</b>                 | 65.45                   |
|                       | CH <sub>2</sub>                                                       | 4.05-4.15              | dd                        | 70.32                   |
|                       | CH                                                                    | 3.82                   | m                         | 75.12                   |
| Triglyceride          | CH                                                                    | 5.13-5.21              | m                         | 77.45                   |
|                       | 2CH <sub>2</sub>                                                      | <b>4.15-4.29</b>       | <b>dd</b>                 | 68.23                   |
| Oleanoic acid         | CH <sub>2</sub> -1                                                    | 0.85                   | t                         | 45.4                    |
|                       | CH <sub>2</sub> -2                                                    | 1.44                   | m                         | 24.5                    |
|                       | CH-3                                                                  | <b>3.60</b>            | <b>m</b>                  | <b>76.7</b>             |
|                       | CH-5                                                                  | 0.66                   | m                         | 54.6                    |
|                       | CH <sub>2</sub> -6                                                    | 1.30                   | m                         | 28.8                    |
|                       | CH <sub>2</sub> -7                                                    | 1.63                   | m                         | 28.9                    |
|                       | CH-9                                                                  | 1.44                   | m                         | 46.8                    |
|                       | CH <sub>2</sub> -11                                                   | 1.82                   | d                         | 22.6                    |
|                       | CH-12                                                                 | 5.16                   | bs                        | 121.4                   |

|                         |                                |                |           |         |
|-------------------------|--------------------------------|----------------|-----------|---------|
|                         | CH2-16                         | 1.63           | m         | 24.5    |
|                         | CH2-17                         | 1.44           | m         | 24.5    |
|                         | CH-18                          | 2.76           | m         | 34.2    |
|                         | CH-19                          | 1.63           | m         | 45.8    |
|                         | CH2-21                         | 1.30           | m         | 13.8    |
|                         | CH2-22                         | 1.44           | m         | 29.3    |
|                         | CH3-23,24                      | 0,87           | t         | 11.4    |
|                         | CH3-25,26                      | 0.66           | m         | 13.8    |
|                         | CH3-27                         | 1.10           | m         | 25.4    |
|                         | CH3-29                         | 0.87           | t         | 31.8    |
|                         | CH3-30                         | 0.87           | t         | 22.5    |
| <b>Carotenoids</b>      | CH <sub>2</sub> -2,2'          | 1.47           | m         | 39.62   |
|                         | CH <sub>2</sub> -3,3'          | 1.62           | m         | 19.27   |
|                         | CH <sub>2</sub> -4,4'          | 2.02           | m         | 33.18   |
|                         | CH-7,7'                        | 6.15           | d         | 126.68  |
|                         | CH-8,8'                        | 6.14           | d         | 137.78  |
|                         | CH-10,10'                      | 6.14           | d         | 130.88  |
|                         | <b>CH-11,11'</b>               | <b>6.68</b>    | <b>m</b>  | 125.04  |
|                         | CH-12,12'                      | 6.35           | d         | 137.26  |
|                         | CH-14,14'                      | 6.25           | d         | 132.45  |
|                         | CH-15,15'                      | 6.63           | m         | 130.02  |
|                         | CH <sub>3</sub> -16,16',17,17' | 1.03           | s         | 29.01   |
|                         | CH <sub>3</sub> -18,18'        | 1.72           | s         | 21.77   |
| CH <sub>3</sub> -19,19' | 1.97                           | s              | 12.81     |         |
| <b>Phenols</b>          | <b>Aromatic moieties</b>       | <b>6.8-7.0</b> | <b>m</b>  | 130-140 |
| <b>Aldehydes</b>        | <b>CHO</b>                     | <b>9.76</b>    | <b>bs</b> | 204.01  |

<sup>1</sup>Metabolites identified in the <sup>1</sup>H NMR spectrum of the chloroform (C) and hexane (H) extracts of marcs; <sup>2</sup>In bold are evidenced the resonances chosen for metabolite quantification; <sup>3</sup> s: singlet, bs: broad singlet, d: doublet, t: triplet, dd: doublet of doublets, m: multiplet.

Figure S9. GC-MS qualitative analysis for CM extract

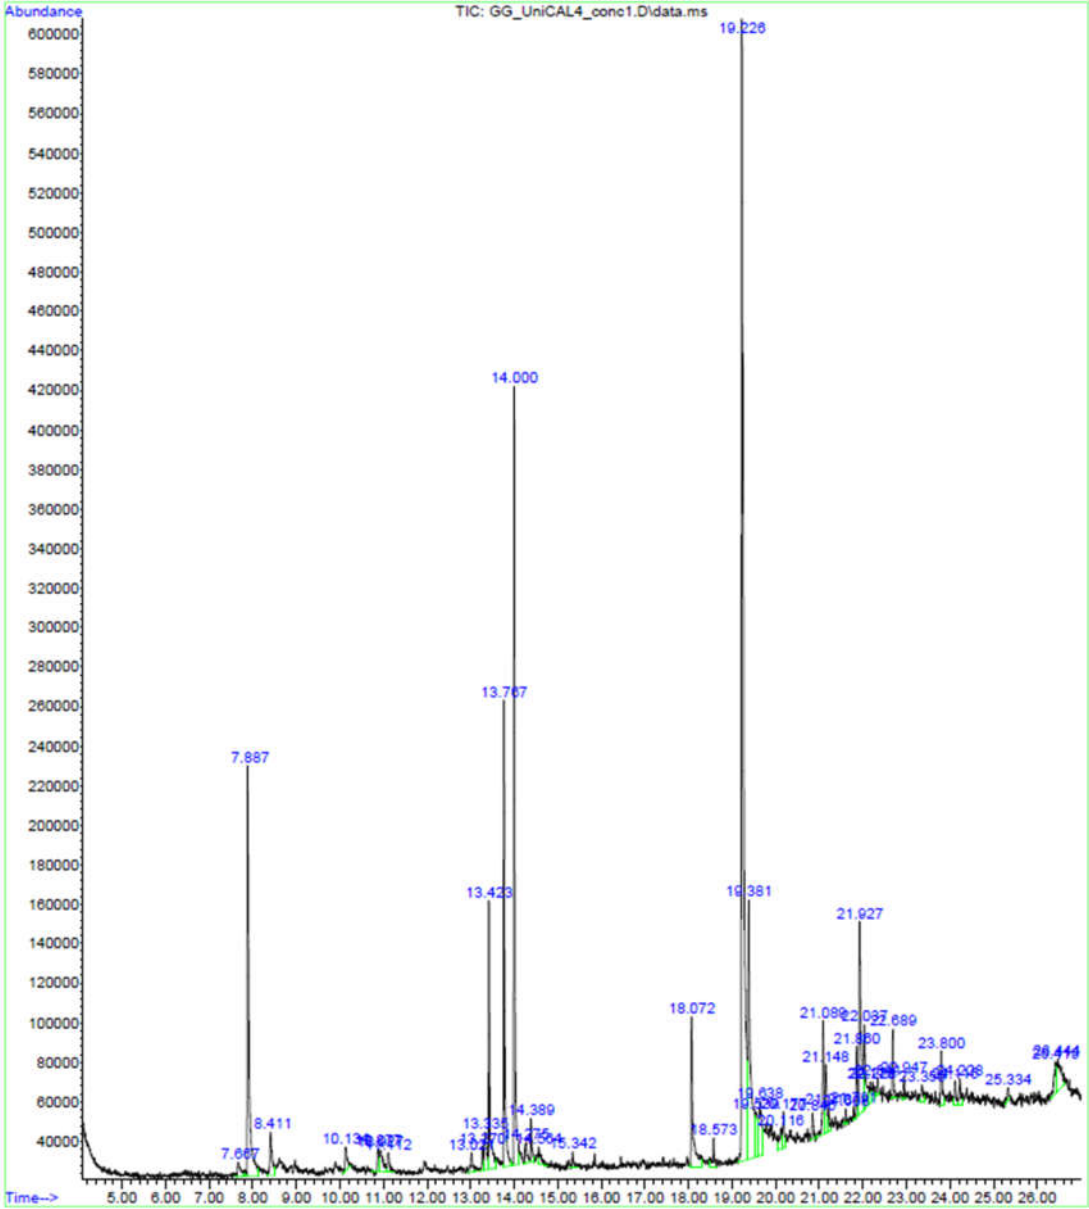

Table S2. Identification of CM peaks

| RT                                  | Area% | Library/ID                       | Quality |
|-------------------------------------|-------|----------------------------------|---------|
| 7.890                               | 12,45 | 2-Heptenal, (E)-                 | 83      |
| 13.769                              | 9,17  | 2,4-Decadienal, (E,E)-           | 91      |
| 13.997                              | 13,43 | 2,4 DECADIENAL                   | 97      |
| 18.071                              | 5,10  | Hexadecanoic acid                | 96      |
| 18.570                              | 0,86  | Hexadecanoic acid                | 90      |
| 19.227                              | 42,50 | 9,12-Octadecadienoic acid (Z,Z)- | 99      |
| 19.385                              | 11,22 | Octadecanoic acid                | 91      |
| 19.543                              | 2,38  | 9,12-Octadecadienoic acid (Z,Z)- | 90      |
| 21.085                              | 2,91  | LINOLEIC ACID, BUTYL ESTER       | 80      |
| <b><u>Total Identification:</u></b> |       | 73,32%                           |         |

Figure S10. GC-MS qualitative analysis for CP extract

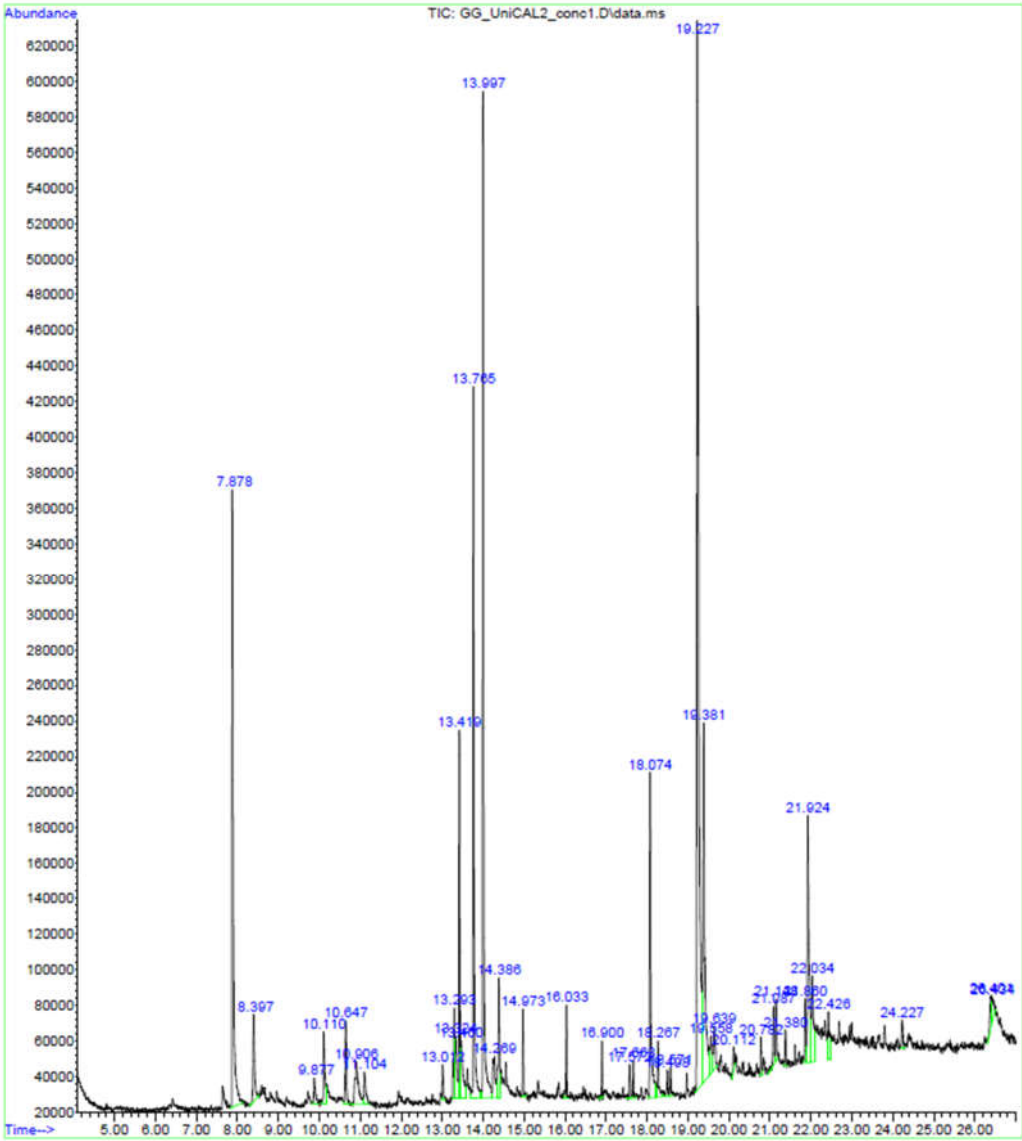

Table S3. Identification of CP peaks

| RT                           | Area% | Library/ID                           | Quality |
|------------------------------|-------|--------------------------------------|---------|
| 7.881                        | 12,59 | 2-Heptenal, (E)-                     | 96      |
| 8.398                        | 2,09  | 1 OCTEN 3 OL                         | 90      |
| 10.106                       | 1,58  | 2 OCTENAL                            | 90      |
| 10.650                       | 1,58  | Hexane, 1,1-diethoxy-                | 90      |
| 13.419                       | 5,01  | 2-Decenal, (E)- (CAS) \$\$ trans-2-D | 87      |
| 13.769                       | 10,21 | 2,4-Decadienal, (E,E)-               | 91      |
| 13.997                       | 15,59 | 2,4-Decadienal, (E,E)-               | 94      |
| 14.969                       | 0,90  | Cycloheptasiloxane, tetradecamethyl- | 86      |
| 17.572                       | 0,51  | Phthalic acid, isobutyl nonyl ester  | 86      |
| 17.659                       | 0,53  | Eicosamethylcyclodecasiloxane        | 90      |
| 18.071                       | 5,58  | Hexadecanoic acid                    | 98      |
| 18.264                       | 0,98  | Tetradecanoic acid, ethyl ester      | 90      |
| 18.571                       | 0,50  | Hexadecanoic acid                    | 90      |
| 19.228                       | 31,19 | 9,12-Octadecadienoic acid (Z,Z)-     | 97      |
| 19.385                       | 9,87  | Linoleic acid ethyl ester            | 99      |
| 19.561                       | 1,31  | 9,12-Octadecadienoic acid (Z,Z)-     | 97      |
| <b>Total Identification:</b> |       | 74,26 %                              |         |

Figure S11. GC-MS qualitative analysis for HM extract

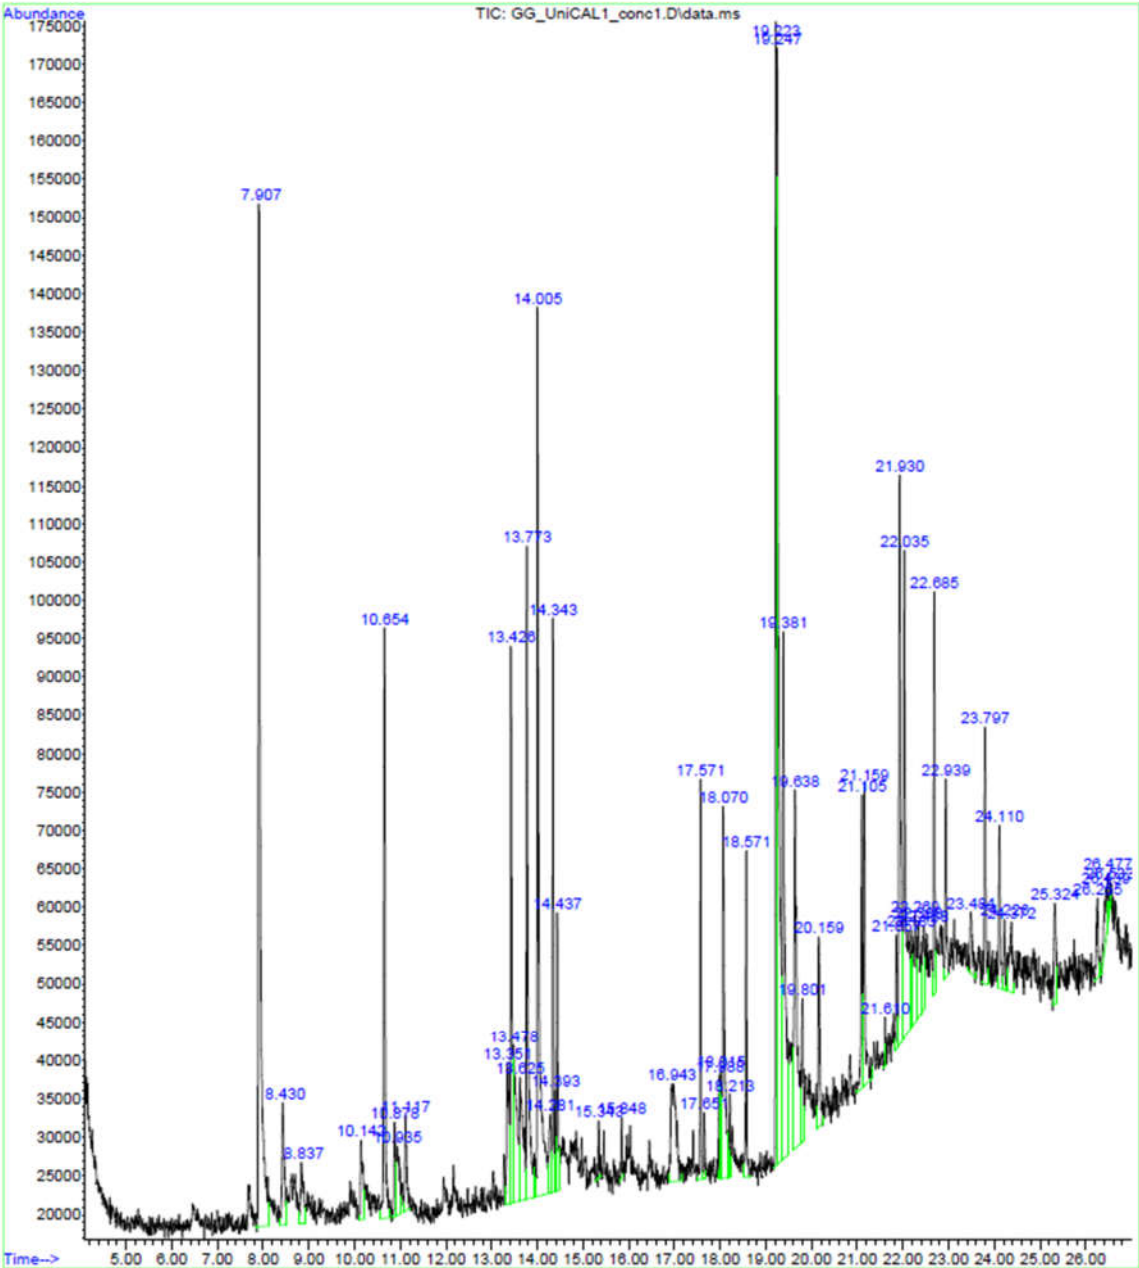



Table S4. Identification of HM peaks

| RT                           | Area% | Library/ID                                              | Quality |
|------------------------------|-------|---------------------------------------------------------|---------|
| 7.907                        | 12,45 | 2-Heptenal, (E)-                                        | 96      |
| 10.650                       | 5,27  | Hexane, 1,1-diethoxy-                                   | 91      |
| 13.427                       | 4,02  | 2-Decenal, (Z)-                                         | 86      |
| 13.769                       | 5,95  | 2,4-Decadienal                                          | 91      |
| 14.005                       | 9,76  | 2,4 DECADIENAL                                          | 97      |
| 16.941                       | 3,31  | 1-Octanamine, N-methyl-N-octyl-                         | 80      |
| 17.572                       | 2,19  | 1,2-Benzenedicarboxylic acid, bis(2-methylpropyl) ester | 90      |
| 18.071                       | 3,96  | Hexadecanoic acid                                       | 91      |
| 18.570                       | 2,07  | Hexadecanoic acid                                       | 93      |
| 19.219                       | 6,59  | 9,12-Octadecadienoic acid (Z,Z)-                        | 98      |
| 19.245                       | 14,09 | 9-Octadecenoic acid (Z)-                                | 95      |
| 19.385                       | 7,58  | Octadecanoic acid                                       | 92      |
| 19.639                       | 5,92  | 9,12-Octadecadienoic acid (Z,Z)-                        | 98      |
| 19.797                       | 1,69  | Octadecanoic acid                                       | 81      |
| 20.156                       | 2,13  | 1-Octanamine, N,N-dioctyl-                              | 86      |
| 21.103                       | 2,50  | 7,12-dioxobenzo[k]fluoranthene                          | 86      |
| 21.155                       | 2,53  | Octadecane                                              | 97      |
| 22.031                       | 5,57  | Eicosane                                                | 95      |
| 22.689                       | 2,41  | 13-Hexacosyne                                           | 80      |
| <b>Total Identification:</b> |       | 70,73 %                                                 |         |

Figure S12. GC-MS qualitative analyses for HP extract

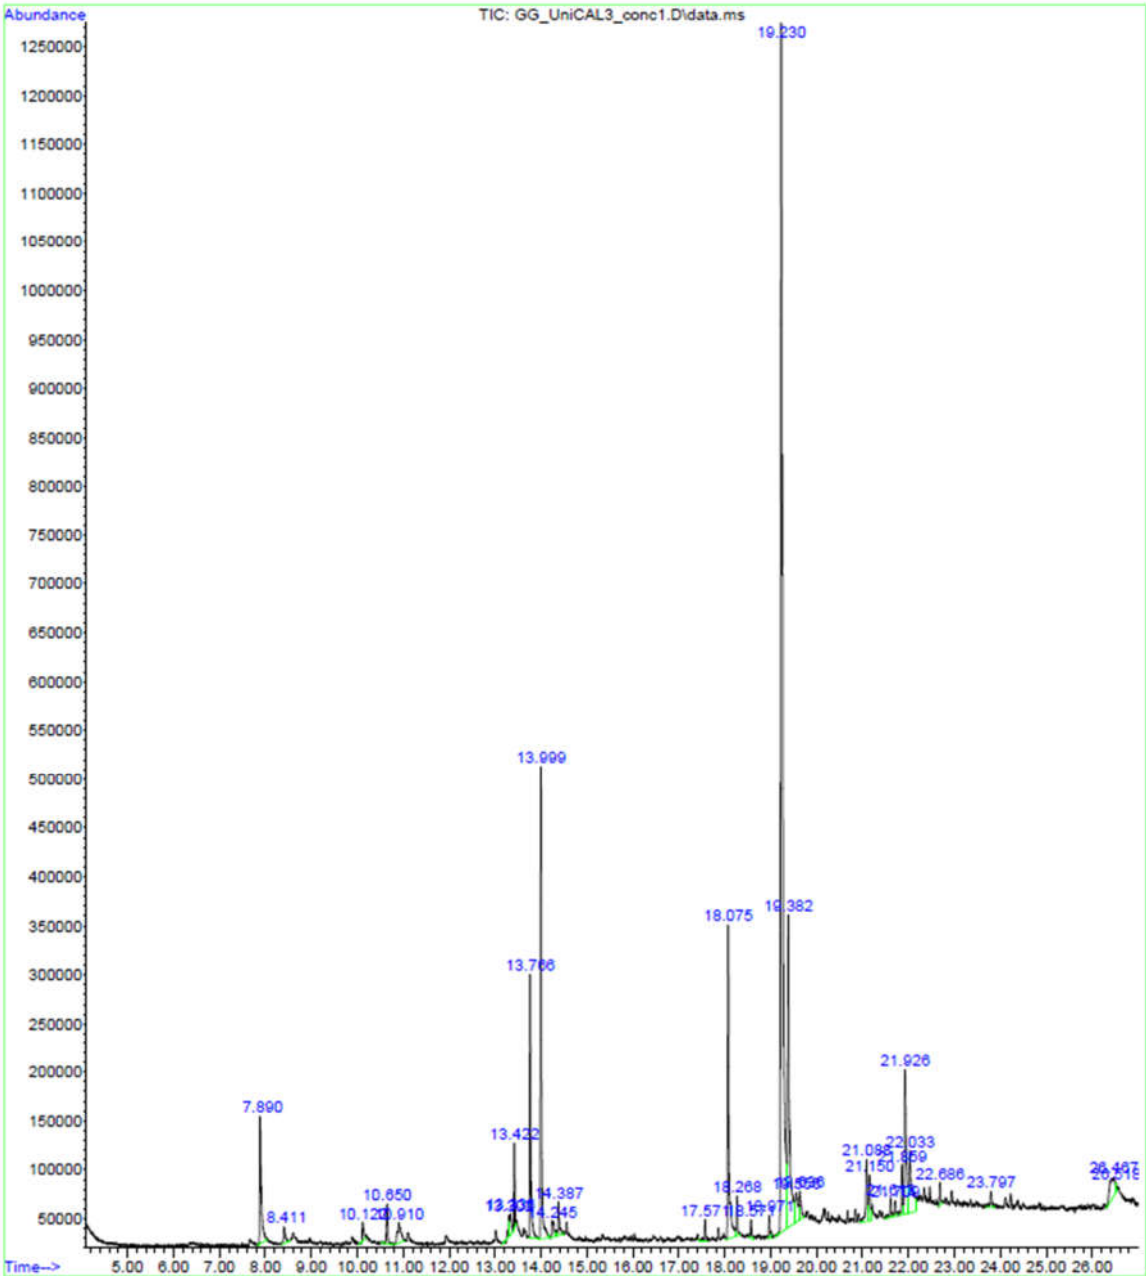

Table S5. Identification of HP peaks

| RT                           | Area% | Library/ID                                              | Quality |
|------------------------------|-------|---------------------------------------------------------|---------|
| 7.890                        | 4,53  | 2-Heptenal, (E)-                                        | 90      |
| 10.124                       | 0,59  | 2-Octenal, (E)-                                         | 90      |
| 10.650                       | 1,18  | Hexane, 1,1-diethoxy-                                   | 91      |
| 13.418                       | 1,48  | 2-Decenal, (E)-                                         | 80      |
| 13.769                       | 5,83  | 2,4-Decadienal, (E,E)-                                  | 91      |
| 13.997                       | 10,37 | 2,4 DECADIENAL                                          | 97      |
| 14.382                       | 0,93  | E-2-dodecenal                                           | 80      |
| 17.572                       | 0,53  | 1,2-Benzenedicarboxylic acid, bis(2-methylpropyl) ester | 86      |
| 18.071                       | 8,03  | Hexadecanoic acid                                       | 99      |
| 18.264                       | 0,89  | Hexadecanoic acid, ethyl ester                          | 99      |
| 18.570                       | 0,52  | Hexadecanoic acid                                       | 93      |
| 19.228                       | 49,60 | 9,12-Octadecadienoic acid (Z,Z)-                        | 99      |
| 19.385                       | 12,30 | 9,12-Octadecadienoic acid, ethyl ester                  | 97      |
| 19.552                       | 1,54  | 9,12-Octadecadienoic acid (Z,Z)-                        | 93      |
| 19.639                       | 1,20  | 9,12-Octadecadienoic acid (Z,Z)-                        | 86      |
| 21.611                       | 0,48  | Eicosane                                                | 93      |
| <b>Total Identification:</b> |       | 81,07%                                                  |         |

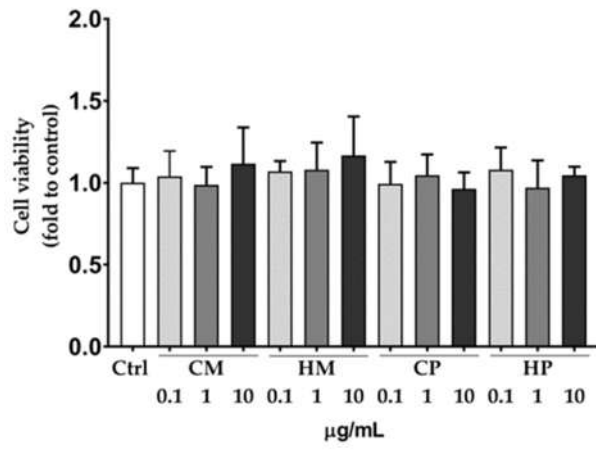

Figure S13. HaCaT cell viability assay
